# Supplementary material
Source: MDPI journal article supplement (https://www.mdpi.com/2410-387X/1/1/8)
Supplement: s1 [file s1]

List of changes

1. We reduced the number of corresponding authors to be two.
2. We added the full name definition of all the acronyms that are necessary.
3. All the bold and Italic font in the manuscript are necessary.
4. We confirmed with the move of the footnote.
5. We fixed Figure 10 and replaced all the “Original” with “Reference” in the text.
6. We fixed the reference information.
7. There is no funding sources to claim.
